# Supplementary material
Source: Elsevier journal article supplement (https://www.sciencedirect.com/science/article/pii/S0212656710004191)
Supplement: mmc1 [file S0212656710004191:mmc1.doc]

**ANEXO PARA VERSIÓN ELECTRÓNICA.**

**CUESTIONARIO COORDINADORES FACULTADES PARTICIPANTES**

Por favor, conteste a las siguientes preguntas con el máximo detalle, utilizando todo el espacio que precise. Si lo cree conveniente, puede adjuntar al cuestionario los documentos que considere necesarios.

La información recogida debe referirse a la situación durante el **curso 2008-2009**.

**A. DATOS GENERALES**

Identificación de la Facultad:…………………………………………………………………

Número de alumnos matriculados por curso:

1º: ………………….

2º: ………………….

3º: ………………….

4º: ………………….

5º: ………………….

6º: ………………….

Número de profesores de la facultad:

- Profesores asociados:…………..………………………………
- Profesores titulares:…………...………………………………..
- Otros (especificar):………………………………………………

……………………………………………….

……………………………………………….

……………………………………………….

- Total:………………………………………………………………

Comentarios

|  |
| --- |

**Hospital(es) universitario(s)**

Número total de hospitales………………….………..…………………………

Clasificación según ámbito: Regional:……………………….…..

Comarcal:……………………….….

Otros (especificar): ………………..

Clasificación según complejidad: Alta: …………………………………

Media: ………………………………

Baja:…………………………………

Comentarios

|  |
| --- |

**Centros de salud universitarios**

Número de centros de salud universitarios (conveniados): ……………………………..

Número de centros de salud de otro tipo que participan en la formación universitaria:

Acreditados: ……………………………………….

No acreditados:……………………………………

Comentarios

|  |
| --- |

**Médicos de familia profesores**

Número de médicos de familia profesores:

Titulares: …………………………….

Asociados:…………………..……….

Otras categorías (especificar):………………………………….

…………………………………..

…………………………………..

Total:…………………………………

Número de médicos de familia profesores que son doctores:…………………………

Número de médicos de familia profesores acreditados por la ANECA: ……………..

Departamento(s) de adscripción:……………………………………………………………

…………………………………………………………….

Comentarios

|  |
| --- |

**B. ASIGNATURA DE MEDICINA DE FAMILIA**

¿Tu Facultad cuenta con una asignatura sobre medicina de familia?

- Sí  Especificar el año de inicio (no el curso de la licenciatura)::…………….
- No **** PASA A LA SIGUIENTE SECCIÓN

En caso de respuesta afirmativa a la pregunta anterior, la asignatura es:

- Obligatoria ****
- Optativa ****

Si ha cambiado de optativa a obligatoria señala el año del cambio:………………….

En caso de ser una asignatura optativa ¿qué porcentaje de alumnos de cada año la eligen?

- < 10% ****
- 11-25% ****
- 26-50% ****
- 51-75% ****
- > 75% ****

¿Cuantos créditos representa la asignatura de medicina de familia?

Número de créditos: ………………………………

Porcentaje sobre el total de créditos de la licenciatura……………………………

¿En que año(s) de la licenciatura se imparte esta asignatura……………………………..………

¿Cuanto tiempo lectivo (en horas de clase) se destina a la asignatura?…………………………

Número de clases teóricas que se dan en la asignatura:……………........................................

¿Quién imparte esta asignatura en la Facultad?

Médicos de familia: …………………………………………….

Otros especialistas (especificar): ……………………………………………………………

……………………………………………………………

……………………………………………………………

……………………………………………………………

……………………………………………………………

¿Cómo se evalúa a los estudiantes en la asignatura?

Examen mediante preguntas tipo test ****

Examen mediante preguntas texto libre ****

Combinación de los dos anteriores ****

Evaluación clínica y objetiva estructurada ACOE ****

Otros métodos (especificar) ****

………………………………………………………………………………………………………………

………………………………………………………………………………………………………………

………………………………………………………………………………………………………………

………………………………………………………………………………………………………………

………………………………………………………………………………………………………………

¿Se realiza una encuesta de satisfacción de los alumnos?

- Sí ****
- No ****

En caso afirmativo, por favor haga una síntesis de la opinión global:

|  |
| --- |

¿Se evalúa a los profesores de la asignatura?

- Sí ****
- No ****

En caso afirmativo, especificar el método:

………………………………………………………………………………………………………………

………………………………………………………………………………………………………………

………………………………………………………………………………………………………………

………………………………………………………………………………………………………………

………………………………………………………………………………………………………………

Comentarios

|  |
| --- |

**C. ROTACIÓN EN MEDICINA DE FAMILIA/ATENCIÓN PRIMARIA**

¿Existe una rotación en medicina de familia por los centros de salud acreditados?

- Sí  Especificar el año de instauración del programa de rotaciones (no el curso de la licenciatura):…………….
- No **** PASA A LA SIGUIENTE SECCIÓN

En caso de respuesta afirmativa a la pregunta anterior, la rotación es:

- Obligatoria ****
- Optativa ****

Si ha cambiado de optativa a obligatoria señala el año del cambio:………………….

En caso de ser optativa ¿qué porcentaje de alumnos de cada año la realizan?

- < 10% ****
- 11-25% ****
- 26-50% ****
- 51-75% ****
- > 75% ****

¿Cuantos créditos representa la rotación?

Número de créditos: ………………………………

Porcentaje sobre el total de créditos de la licenciatura……………………………

¿En que año(s) de la licenciatura se realiza esta rotación……………………………..………

Duración de la rotación (en días lectivos): …………………………………………

¿La rotación se realiza exclusivamente en centros de salud?

- Sí 
- No ****

Si la respuesta anterior es negativa, especificar qué otros recursos participan en las rotaciones:

……………………………………………………………………………………………….

……………………………………………………………………………………………….

……………………………………………………………………………………………….

……………………………………………………………………………………………….

……………………………………………………………………………………………….

El coordinador de las rotaciones es:

Médico de familia: …………………………………………….

Otro especialista (especificar): ……………………………………………………………

¿Cómo se evalúa a los estudiantes en las rotaciones?

Examen mediante preguntas tipo test ****

Examen mediante preguntas texto libro ****

Combinación de los dos anteriores ****

Evaluación clínica y objetiva estructurada ACOE ****

Otros métodos (especificar) ****

………………………………………………………………………………………………………………

………………………………………………………………………………………………………………

………………………………………………………………………………………………………………

………………………………………………………………………………………………………………

………………………………………………………………………………………………………………

¿Se realiza una encuesta de satisfacción de los alumnos?

- Sí ****
- No ****

En caso afirmativo, por favor haga una síntesis de la opinión global:

|  |
| --- |

¿Se evalúa a los profesores/tutores de la rotación?.

- Sí ****
- No ****

En caso afirmativo, especificar el método:

………………………………………………………………………………………………………………

………………………………………………………………………………………………………………

………………………………………………………………………………………………………………

………………………………………………………………………………………………………………

………………………………………………………………………………………………………………

Comentarios

|  |
| --- |

**D. PARTICIPACIÓN EN OTRAS ACTIVIDADES DOCENTES Y ACADÉMICAS**

Másters y docencia de postgrado

|  |
| --- |

Tesis doctorales

|  |
| --- |

Otras actividades

|  |
| --- |

**E. COMENTARIOS FINALES**

Cuantifica tu percepción del grado de sensibilidad de los estamentos directivos y académicos **de la facultad** en relación a la formación en MF en una escala de 0 (nulo) a 10 (muy elevado):

**Nulo Muy elevado**

**0 1 2 3 4 5 6 7 8 9 10**

Cuantifica tu percepción del grado de sensibilidad de los estamentos directivos y académicos **del Departamento** en relación a la formación en MF en una escala de 0 (nulo) a 10 (muy elevado):

**Nulo Muy elevado**

**0 1 2 3 4 5 6 7 8 9 10**

Comentarios finales

|  |
| --- |

**F. ANEXOS DOCUMENTALES**

Si lo crees necesario, puedes adjuntar los documentos completos o extractos amplios de los mismos sobre los programas de formación u otros aspectos que consideres importantes para conocer mejor la situación de la docencia en medicina de familia en tu facultad.

**Documentos que se adjuntan:**

1. …………………………………………………………………………………………………

2. …………………………………………………………………………………………………

3. …………………………………………………………………………………………………

4. …………………………………………………………………………………………………

5. …………………………………………………………………………………………………

6. …………………………………………………………………………………………………

7. …………………………………………………………………………………………………

8. …………………………………………………………………………………………………

9. …………………………………………………………………………………………………

10. …………………………………………………………………………………………………
